# Supplementary material
Source: publisher site journal article supplement (https://www.dovepress.com/get_supplementary_file.php?f=434296.docx)
Supplement: Supplementary file 1 [file get_supplementary_file.php]

**Supplemental Table 1 Safety Events of Patients Based on Intravenous Alteplase**

|  | **Alteplase**  **N=102** | **No alteplase**  **N=1774** |
| --- | --- | --- |
| **Total dosage of alteplase, mg, mean±SD** | 56.2±10.7 | / |
| **Complication of alteplase, n(%)** |  |  |
| Non-severe complication | 7 (6.9) | 0 |
| Severe complications |  |  |
| sICH within 36 hours | 0 | 0 |
| Life-threatening systemic bleeding within 36 hours | 0 | 0 |
| Other sever complication | 1 (1.0) | 0 |

Abbreviations: sICH, symptomatic intracerebral hemorrhage.
